# Supplementary material for: Undifferentiated colonic neoplasm with SMARCA4 germline gene mutation and loss of SMARCA4 protein expression: a case report and literature review
Source: Springer Nature journal article supplement (doi:10.1186/s13000-021-01091-6), 2021-04-09
Supplement: MOESM1 [file 19051160]

**Supplementary Table 1.** The clinicopathological and molecular features of SMARCA4-deficient tumors were summarized.

| References                     | Pathology   | Median age                                | Morphology                                                                                                                                         | IHC                                                                                                                                 | Molecular change                           | Prognosis                                               | Potential treatment                     |
|--------------------------------|-------------|-------------------------------------------|----------------------------------------------------------------------------------------------------------------------------------------------------|-------------------------------------------------------------------------------------------------------------------------------------|--------------------------------------------|---------------------------------------------------------|-----------------------------------------|
| Kolin, D. L. 2018              | SDUS        | 36 year old                               | sheets of large atypical epithelioid cells with prominent rhabdoid morphology                                                                      | Loss of SMARCA4, negative of focally positive for keratins, EMA                                                                     | SMARCA4 mutation                           | Extensive lymphovascular invasion; extra-uterine spread |                                         |
| Douglas I. L, 2019             | SDUS        | 49 year old                               | predominantly rhabdoid or large epithelioid cells with abundant cytoplasm, but also had varying degrees of small cell and spindle cell morphology. | Loss of SMARCA4                                                                                                                     | Germline SMRCA4 mutation, MSS              | Most tumors were aggressive with distant metastasis     |                                         |
| Raul P, 2019 and Takada K 2019 | SMARCA4-DTS | Young adults with a heavy smoking history | Rhabdoid or poorly differentiated phenotype                                                                                                        | Loss of expression of SMARCA4 and SMARCA2, focal or diffuse expression of at least 2 of the following markers: SOX2, CD34 or SALL4. |                                            | Median survival 6-7 months                              | Response to pembrolizumab (case report) |
| Leora W, 2014 and Xue Y, 2019  | SCCOHT      | 29 year old                               | dominant appearance of small, hyperchromatic cells with scant cytoplasm with or without a rhabdoid appearance                                      | Loss of SMARCA4 (95%)                                                                                                               | Somatic or germline SMARCA4 mutation (93%) | Very aggressive                                         | Sensitive to CDK4/6 inhibitors          |

|                                           |                                                |             |                                                                                                 |                                                  |                                     |                                      |                                                               |
|-------------------------------------------|------------------------------------------------|-------------|-------------------------------------------------------------------------------------------------|--------------------------------------------------|-------------------------------------|--------------------------------------|---------------------------------------------------------------|
| Esther H,2017                             | SMARCA4-deficient NSCLC                        | 72 year old | Differentiated (glandular or squamous) histology                                                | Loss of SMARCA4, TTF-1 negative                  |                                     |                                      | predictor of chemosensitivity to platinum-based chemotherapy. |
| Abbas A,2017 ;Xue Y,2019 and Naito T,2019 | SMARCA4-deficient pulmonary adenocarcinoma     | 60 year old | Focal unequivocal glands, no squamous differentiation, rhabdoid appearance                      | Loss of SMARCA4, CK7+/HepPar-1+/TTF1-            | no EGFR mutation                    | synchronous distant metastases (77%) | Sensitive to CDK4/6 inhibitors. Nivolumab (case report) .     |
| Shih-Chiang H ,2020                       | Gastric cancer with altered SMARCA4 expression | 70 year old | Undifferentiated carcinoma/tubular or solid adenocarcinoma, with or without rhabdoid morphology | Lost/reduced/heterogeneous expression of SMARCA4 | SMARCA4 mutation or ARID1A mutation | 16.3 month (median OS)               |                                                               |

SDUS, SMARCA4-deficient undifferentiated uterine sarcoma; SMARCA4-DTS, SMARCA4-deficient thoracic sarcoma; SCCOHT, Small cell carcinoma of the ovary, hypercalcemic type; NSCLC, non-small cell lung cancer
